# Supplementary material for: Decreased retinal thickness in patients with Alzheimer’s disease is correlated with disease severity
Source: PubMed Central journal article supplement (PMC6830808; doi:10.1371/journal.pone.0224180), 2019-11-05
Supplement: pone.0224180.s001.pdf [file pone.0224180.s001.pdf]

| number | Sex | Age | Group   | MMSE | GDS | CDR | VOD | VOS | G.A.OD | G.M.OD | G.A.OS |
|--------|-----|-----|---------|------|-----|-----|-----|-----|--------|--------|--------|
| 1      | M   | 71  | s AD    | 18   | 5   | 1   | 0.9 | 0.9 | 69     | 65     | 70     |
| 2      | M   | 81  | m AD    | 19   | 3   | 1   | 0.9 | 0.9 | 61     | 49     | 61     |
| 3      | M   | 72  | m AD    | 23   | 4   | 1   | 0.8 | 0.6 | 96     | 74     | 70     |
| 4      | M   | 53  | m AD    | 25   | 4   | 1   | 1.0 | 1.0 | .      | .      | .      |
| 5      | F   | 74  | s AD    | 15   | 5   | 1   | .   | .   | 82     | 80     | 76     |
| 6      | F   | 74  | s AD    | 8    | 6   | 2   | 0.5 | 0.5 | 64     | 59     | 64     |
| 7      | F   | 78  | s AD    | 12   | 6   | .   | .   | .   | 46     | 23     | .      |
| 8      | F   | 82  | s AD    | 9    | 5   | 1   | 0.1 | 0.2 | .      | .      | .      |
| 9      | F   | 82  | m AD    | 11   | 4   | 1   | 0.6 | 0.7 | .      | .      | 92     |
| 10     | M   | 65  | s AD    | 3    | 6   | 3   | .   | 1.0 | .      | .      | 76     |
| 11     | F   | 71  | m AD    | 16   | 5   | 1   | 1.0 | 1.0 | 69     | 58     | 67     |
| 12     | M   | 79  | m AD    | 20   | 4   | 1   | 0.7 | 0.9 | 73     | 63     | 74     |
| 13     | M   | 83  | s AD    | 10   | 5   | 1   | 0.2 | 0.2 | 56     | 0      | 74     |
| 14     | M   | 87  | m AD    | 14   | 4   | 1   | 0.5 | 0.5 | 69     | 50     | 76     |
| 15     | F   | 70  | s AD    | 18   | 5   | 1   | 0.7 | 0.8 | 72     | 63     | 54     |
| 16     | F   | 58  | aMCI    | 26   | 3   | 1   | 1.0 | 1.0 | 90     | 85     | 88     |
| 17     | M   | 78  | aMCI    | 26   | 3   | 1   | 0.6 | 0.5 | 78     | 67     | 37     |
| 18     | F   | 71  | aMCI    | 21   | 3   | 1   | 0.6 | 0.5 | 86     | 80     | 88     |
| 19     | F   | 67  | aMCI    | 23   | 3   | 1   | 1.0 | 1.0 | 73     | 65     | 74     |
| 20     | F   | 52  | aMCI    | 26   | 3   | 1   | 1.0 | 1.0 | 90     | 86     | 90     |
| 21     | F   | 70  | aMCI    | 26   | 3   | 1   | .   | .   | .      | .      | .      |
| 22     | F   | 77  | aMCI    | 23   | 3   | 1   | .   | .   | .      | .      | .      |
| 23     | M   | 78  | aMCI    | 25   | 3   | 1   | 1.0 | 0.9 | 72     | 69     | 74     |
| 24     | M   | 75  | aMCI    | 24   | 3   | 1   | 1.0 | 1.0 | 82     | 76     | 81     |
| 25     | F   | 78  | m AD    | 17   | 4   | 1   | 1.0 | 1.0 | 74     | 63     | 76     |
| 26     | M   | 71  | aMCI    | 24   | 3   | 1   | 0.4 | 0.9 | 69     | 67     | 68     |
| 27     | M   | 67  | aMCI    | 25   | 3   | 1   | 1.2 | 1.2 | 87     | 85     | 84     |
| 28     | F   | 70  | aMCI    | 21   | 3   | 1   | 1.0 | 0.9 | 90     | 88     | 93     |
| 29     | M   | 58  | aMCI    | 27   | 3   | 1   | 1.2 | 1.2 | 93     | 90     | 93     |
| 30     | F   | 69  | aMCI    | 22   | 3   | 1   | 0.3 | 1.0 | 34     | .      | 82     |
| 31     | M   | 69  | control | .    | .   | .   | 0.8 | 0.6 | 80     | 76     | 80     |
| 32     | M   | 67  | control | .    | .   | .   | 0.7 | 0.7 | 72     | 70     | 67     |
| 33     | M   | 63  | control | .    | .   | .   | 1.0 | 0.9 | 79     | 73     | 89     |
| 34     | F   | 64  | control | .    | .   | .   | 0.9 | 1.0 | 93     | 84     | 92     |
| 35     | F   | 73  | control | .    | .   | .   | 0.7 | 1.0 | 77     | 74     | 77     |
| 36     | F   | 68  | control | .    | .   | .   | 0.7 | 0.7 | 42     | 11     | 78     |
| 37     | F   | 71  | control | .    | .   | .   | 0.8 | 0.8 | 70     | 63     | 72     |
| 38     | M   | 64  | control | .    | .   | .   | 1.0 | 0.9 | 75     | 56     | 86     |
| 40     | F   | 63  | control | .    | .   | .   | 1.0 | 1.0 | 83     | 83     | 83     |
| 43     | F   | 63  | control | .    | .   | .   | 1.0 | 1.0 | 74     | 70     | 75     |
| 44     | F   | 65  | control | .    | .   | .   | 1.2 | 1.2 | 84     | 80     | 83     |
| 45     | M   | 64  | control | .    | .   | .   | 1.0 | 1.2 | 83     | 80     | 94     |

|    |   |    |         |   |   |   |     |     |    |    |    |
|----|---|----|---------|---|---|---|-----|-----|----|----|----|
| 48 | M | 76 | control | . | . | . | 0.8 | 1.0 | 73 | 69 | 70 |
| 49 | F | 73 | control | . | . | . | 0.8 | 0.7 | 80 | 74 | 77 |
| 51 | F | 76 | control | . | . | . | 1.0 | 1.0 | 80 | 62 | 81 |
| 52 | F | 63 | control | . | . | . | 0.9 | 0.9 | 79 | 77 | 81 |
| 55 | M | 66 | control | . | . | . | 1.0 | 1.0 | 85 | 82 | 85 |

| G.M.OD_A | M.OCTOD | M.OCTOS | R.OCTOD | R.OCTOS | R.OCTD.S | R.OCTD.I | R.OCTD.N |
|----------|---------|---------|---------|---------|----------|----------|----------|
| 67       | 240     | 242     | 81      | 79      | 107      | 117      | 53       |
| 58       | 263     | 270     | 46      | 54      | 66       | 56       | 16       |
| 46       | 261     | 247     | 92      | 98      | 109      | 139      | 60       |
| .        | .       | .       | 88      | 89      | 129      | 114      | 47       |
| 43       | 468     | 315     | 95      | 102     | 108      | 121      | 70       |
| 64       | 222     | 215     | 65      | 70      | 82       | 78       | 53       |
| .        | 239     | 237     | 66      | 72      | 63       | 91       | 57       |
| .        | 241     | 248     | 56      | 59      | 63       | 66       | 55       |
| 77       | 253     | 244     | 79      | 96      | 75       | 117      | 66       |
| 75       | .       | 224     | .       | .       | .        | .        | .        |
| 60       | 258     | 256     | 84      | 81      | 119      | 113      | 62       |
| 65       | 262     | 263     | 82      | 89      | 94       | 99       | 68       |
| 67       | .       | .       | 88      | 89      | 109      | 102      | 69       |
| 65       | 269     | 272     | 81      | 67      | 98       | 104      | 62       |
| 27       | 263     | 236     | 78      | 68      | 86       | 108      | 56       |
| 84       | 215     | 214     | 92      | 93      | 121      | 128      | 61       |
| 13       | 242     | 186     | 89      | 79      | 107      | 113      | 65       |
| 69       | 236     | 245     | 96      | 90      | 99       | 129      | 79       |
| 70       | 252     | 248     | 82      | 81      | 94       | 130      | 57       |
| 83       | 251     | 250     | 104     | 104     | 135      | 128      | 70       |
| .        | .       | .       | 91      | 90      | 117      | 127      | 61       |
| .        | .       | .       | 79      | 89      | 106      | 60       | 55       |
| 73       | 272     | 278     | 76      | 78      | 96       | 96       | 52       |
| 75       | 282     | 278     | 94      | 92      | 119      | 115      | 80       |
| 72       | 281     | 284     | 83      | 86      | 88       | 107      | 63       |
| 64       | 269     | 267     | 90      | 85      | 116      | 119      | 60       |
| 49       | 285     | 279     | 88      | 85      | 104      | 99       | 73       |
| 89       | 316     | 315     | 101     | 100     | 127      | 134      | 77       |
| 91       | 286     | 286     | 96      | 100     | 117      | 124      | 75       |
| 76       | 230     | 246     | 97      | 93      | 146      | 129      | 60       |
| 75       | 230     | 228     | 98      | 101     | 141      | 132      | 68       |
| 65       | 259     | 261     | 90      | 85      | 113      | 111      | 76       |
| 87       | 256     | 264     | 85      | 107     | 105      | 120      | 52       |
| 89       | 262     | 251     | 102     | 108     | 130      | 99       | 92       |
| 74       | 245     | 256     | 78      | 83      | 94       | 100      | 54       |
| 66       | 267     | 245     | 83      | 93      | 88       | 115      | 67       |
| 65       | 257     | 254     | 100     | 99      | 118      | 163      | 69       |
| 81       | 248     | 252     | 79      | 89      | 69       | 127      | 73       |
| 82       | 246     | 242     | 93      | 97      | 103      | 111      | 68       |
| 72       | 267     | 261     | 86      | 81      | 102      | 125      | 66       |
| 82       | 279     | 252     | 88      | 83      | 89       | 136      | 58       |
| 91       | 285     | 291     | 87      | 92      | 115      | 108      | 66       |

|    |     |     |    |    |     |     |    |
|----|-----|-----|----|----|-----|-----|----|
| 66 | 246 | 243 | 84 | 78 | 113 | 107 | 58 |
| 57 | 280 | 282 | 86 | 89 | 108 | 113 | 65 |
| 78 | 274 | 269 | 90 | 97 | 116 | 119 | 55 |
| 78 | 272 | 274 | 89 | 87 | 120 | 108 | 69 |
| 82 | 283 | 279 | 96 | 98 | 118 | 131 | 61 |

| R.OCTD.T | R.OCTS.S | R.OCTS.I | R.OCTS.N | R.OCTS.T |
|----------|----------|----------|----------|----------|
| 47       | 103      | 107      | 61       | 47       |
| 47       | 65       | 61       | 49       | 41       |
| 59       | 124      | 130      | 67       | 72       |
| 64       | 122      | 117      | 66       | 53       |
| 81       | 133      | 120      | 66       | 90       |
| 48       | 84       | 85       | 51       | 59       |
| 52       | 86       | 90       | 50       | 62       |
| 40       | 64       | 64       | 69       | 37       |
| 57       | 129      | 116      | 58       | 79       |
| .        | .        | .        | .        | .        |
| 41       | 92       | 116      | 71       | 45       |
| 60       | 101      | 115      | 68       | 73       |
| 72       | 110      | 106      | 62       | 74       |
| 62       | 104      | 59       | 50       | 57       |
| 63       | 90       | 88       | 55       | 39       |
| 60       | 129      | 129      | 59       | 56       |
| 72       | 100      | 89       | 65       | 62       |
| 77       | 97       | 125      | 75       | 62       |
| 47       | 103      | 121      | 56       | 45       |
| 82       | 130      | 134      | 81       | 70       |
| 59       | 109      | 135      | 63       | 54       |
| 93       | 97       | 128      | 55       | 78       |
| 60       | 94       | 97       | 64       | 58       |
| 62       | 134      | 90       | 81       | 64       |
| 72       | 107      | 102      | 72       | 64       |
| 66       | 104      | 110      | 71       | 54       |
| 76       | 86       | 106      | 61       | 77       |
| 68       | 136      | 125      | 66       | 73       |
| 67       | 129      | 136      | 62       | 73       |
| 54       | 133      | 121      | 59       | 58       |
| 53       | 141      | 134      | 72       | 58       |
| 59       | 106      | 107      | 73       | 55       |
| 63       | 144      | 136      | 76       | 73       |
| 86       | 118      | 154      | 85       | 76       |
| 63       | 107      | 110      | 48       | 67       |
| 62       | 119      | 126      | 63       | 64       |
| 47       | 127      | 155      | 66       | 47       |
| 48       | 96       | 129      | 67       | 63       |
| 92       | 105      | 121      | 71       | 89       |
| 53       | 103      | 109      | 58       | 53       |
| 67       | 95       | 118      | 61       | 58       |
| 59       | 121      | 120      | 65       | 63       |

|    |     |     |    |    |
|----|-----|-----|----|----|
| 60 | 100 | 101 | 57 | 55 |
| 59 | 113 | 117 | 61 | 63 |
| 72 | 110 | 129 | 54 | 56 |
| 60 | 116 | 116 | 56 | 58 |
| 76 | 148 | 118 | 55 | 72 |
